# Supplementary material
Source: Springer Nature journal article supplement (https://www.springermedizin.de/resource/supplementary/12936_2012_2751_MOESM8_ESM.pdf/9544152)
Supplement: MOESM8 [file 9544152]

| <b>Authors</b>      | <b>Study site</b>              | <b>Drug evaluated</b> | <b>Dose per day - ART X days</b> | <b>Sample size</b> | <b>D3 parasitaemic (%)</b> | <b>Comment</b>                             |
|---------------------|--------------------------------|-----------------------|----------------------------------|--------------------|----------------------------|--------------------------------------------|
| Dondorp et al. 2009 | Pailin, Cambodia               | AS+MQ                 | 4 mg/kg/day X 3                  | 20                 | 55                         | Area of known artemisinin tolerance        |
| Dondorp et al. 2009 | Pailin, Cambodia               | AS                    | 2 mg/kg/day X 7                  | 20                 | 55                         | Area of known artemisinin tolerance        |
| Priotto et al. 2003 | Mbarara, Uganda                | AS+SP                 | 4 mg/kg/day single dose          | 126                | 36.8                       | Single dose artesunate                     |
| Adjuik et al. 2002  | Mlomp, Senegal                 | AS+AQ                 | 4 mg/kg/day X 3                  | 160                | 10                         | Rate derived from publication figure       |
| Noedl et al. 2010   | Tasanh, Cambodia               | AS                    | 4 mg/kg/day X 7                  | 60                 | 21.9                       | Area of known artemisinin tolerance        |
| Puji et al. 2009    | West Sumba District, Indonesia | AS+AQ                 | 4 mg/kg/day X 3                  | 103                | 12.6                       | Parasitaemia defined by microscopy and PCR |
| Bethell et al. 2011 | Tasanh, Cambodia               | AS                    | 2 mg/kg/day X 7                  | 75                 | 49                         | Area of known artemisinin tolerance        |
| Bethell et al. 2011 | Tasanh, Cambodia               | AS                    | 4 mg/kg/day X 7                  | 40                 | 46                         | Area of known artemisinin tolerance        |
| Bethell et al. 2011 | Tasanh, Cambodia               | AS                    | 6 mg/kg/day X 7                  | 28                 | 48                         | Area of known artemisinin tolerance        |
